# Supplementary material
Source: publisher figshare collection journal article supplement (https://acs.figshare.com/ndownloader/files/6979355)
Supplement: Supplementary file 1 [file 6979355]

## Supporting Information

### **Analysis of vacancy generation and oxygen uptake in Cu doped Pr-CeO<sub>2</sub> materials using neutron and *in-situ* X-ray diffraction**

Anita M. D'Angelo<sup>†</sup>, Nathan A. S. Webster<sup>‡</sup> and Alan L. Chaffee<sup>†\*</sup>

<sup>†</sup> Cooperative Research Centre for Greenhouse Gas Technologies (CO2CRC), School of Chemistry, Monash University, Clayton, VIC, 3800 Australia

<sup>‡</sup> CSIRO Mineral Resources, Private Bag 10, Clayton South, VIC, 3169, Australia

\*corresponding author: alan.chaffee@monash.edu

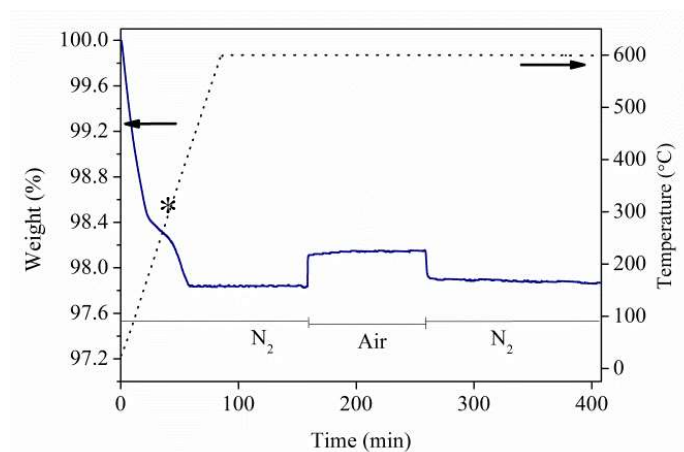

**Figure S1.** TGA curve of  $\text{Ce}_{0.65}\text{Pr}_{0.20}\text{Cu}_{0.15}\text{O}_{2-\delta}$  heated to 600 °C in  $\text{N}_2$  before switching to air then back to  $\text{N}_2$ . The large weight loss of ~98.4% until ~200 °C, as shown by the asterisk, is attributed to absorbed water.

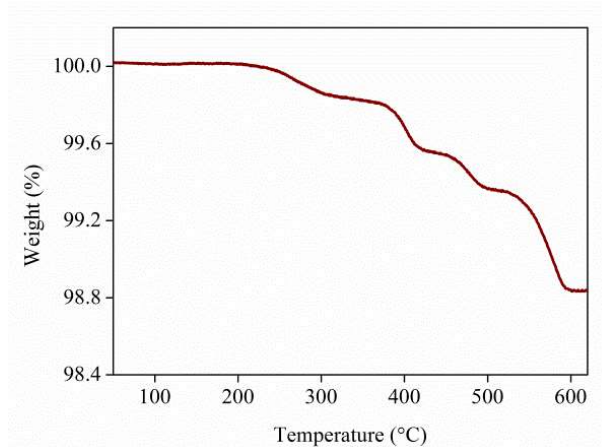

**Figure S2.** TGA profile of  $\text{PrO}_{2-\delta}$  when heated under a flow of  $\text{N}_2$  showing weight losses occur at temperatures greater than 250 °C.

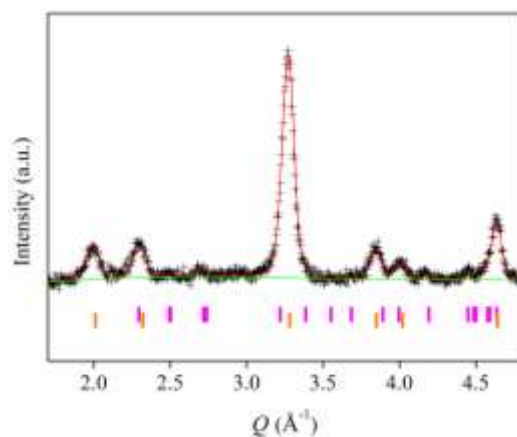

**Figure S3.** Neutron diffraction pattern of 15% Cu-doped Pr-CeO<sub>2</sub> with CeO<sub>2</sub> (space group  $Fm\bar{3}m$ ) reflections shown by the orange markers and CuO (space group  $C2/c$ ) with pink markers.

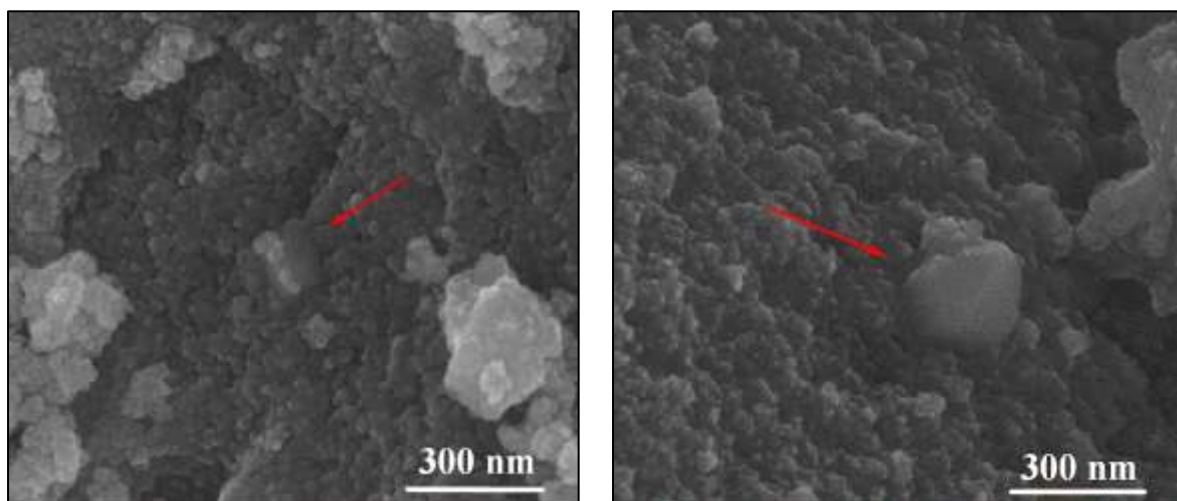

**Figure S4.** SEM images of 10% Cu-doped Pr-CeO<sub>2</sub> showing the presence of larger faceted CuO crystals.
